# Supplementary material
Source: HighWire-hosted journal article supplement (https://openres.ersjournals.com/content/7/1/00537-2020)
Supplement: inline-supplementary-material-1 [file inline-supplementary-material-1.pdf]

**Outcomes with a shorter multidrug-resistant tuberculosis regimen from Karakalpakstan, Uzbekistan**

**Online Supplementary Appendix**

**Table S1: Standardised shorter MDR-TB regimen and weight-based dosing**

|                    | <b>Intensive Phase (4-6 months)</b>                                                                                                                                                                                                                                                                                 | <b>Continuation Phase (5 months)</b>                                                                                                                              |
|--------------------|---------------------------------------------------------------------------------------------------------------------------------------------------------------------------------------------------------------------------------------------------------------------------------------------------------------------|-------------------------------------------------------------------------------------------------------------------------------------------------------------------|
| <b>Duration</b>    | Pyrazinamide + ethambutol + isoniazid + moxifloxacin + capreomycin (kanamycin) + prothionamide + clofazimine for at least four months and smear negative. If smear positive at four months, continue until first sputum culture is negative, maximum six months (when five-month culture result becomes available.) | Pyrazinamide + ethambutol + moxifloxacin + prothionamide + clofazimine for five months, starting after four months or first negative culture, whichever is later. |
| <b>Description</b> | Seven drugs; includes injectable & high dose isoniazid                                                                                                                                                                                                                                                              | Five drugs; only oral drugs in standard dosages.                                                                                                                  |

Dosing of standardised MDR-TB drugs for adults and adolescents >25 kg

| <b>Drug</b>                         | <b>Frequency</b> | <b>Weight range in Kg</b> |              |              |                |
|-------------------------------------|------------------|---------------------------|--------------|--------------|----------------|
|                                     |                  | <b>&lt;25</b>             | <b>25-32</b> | <b>33-50</b> | <b>&gt;50*</b> |
| <b>Isoniazid (H)</b>                | Once daily       | 15-20 mg/kg               | 300mg        | 400mg        | 600mg*         |
| <b>Pyrazinamide (Z)</b>             | Once daily       | 30-40 mg/kg               | 1000mg       | 1600mg       | 2000mg         |
| <b>Ethambutol (E)</b>               | Once daily       | 15-25 mg/kg               | 600mg        | 800mg        | 1200mg         |
| <b>Moxifloxacin (Mfx)</b>           | Once daily       | 7.5-10 mg/kg              | 400mg        | 400mg        | 400mg          |
| <b>Prothionamide (Pto)</b>          | Once daily #     | 15/25 mg/kg               | 250mg        | 500mg        | 750mg*         |
| <b>Clofazimine (Cfz)</b>            | Once daily       | 2-3 mg/kg                 | 100mg        | 100mg        | 100mg          |
| <b>Capreomycin (Cm)<sup>§</sup></b> | Once daily       | 15mg/kg                   |              |              |                |

\*For Prothionamide and isoniazid highest doses are given above 55kg

# Prothionamide can be given in divided doses in the intensive phase if maximum doses are used and the patient has major gastrointestinal side effects not responding to anti-emetics.

§ If sensitive to kanamycin and not taken kanamycin previously then change to kanamycin at the same dose.

**Table S2: Outcome definitions for shorter MDR-TB regimen**

| <b>Outcome</b>                                   | <b>Definition</b>                                                                                                                                                                                                                                                                                                                                                                                                                                                                                                                                                                                                                                   |
|--------------------------------------------------|-----------------------------------------------------------------------------------------------------------------------------------------------------------------------------------------------------------------------------------------------------------------------------------------------------------------------------------------------------------------------------------------------------------------------------------------------------------------------------------------------------------------------------------------------------------------------------------------------------------------------------------------------------|
| <b>Cure</b>                                      | Cure was defined as an MDR-TB patient who completed the treatment according to protocol and has at least four negative cultures from samples collected at least 30 days apart within the final five months of treatment. If there was a positive culture then a minimum of three consecutive negative cultures taken at least 30 days apart in the final 3 months of treatment was required for cure.                                                                                                                                                                                                                                               |
| <b>Treatment complete</b>                        | Defined as an MDR-TB patient who completed treatment according to the protocol, but did not meet the definition for cure because of lack of sufficient bacteriological results.                                                                                                                                                                                                                                                                                                                                                                                                                                                                     |
| <b>Death</b>                                     | Defined as a patient who died for any reason during the course of MDR-TB treatment, or during one year's follow-up, and not already classified as having treatment failure prior to death.                                                                                                                                                                                                                                                                                                                                                                                                                                                          |
| <b>Treatment failure</b>                         | Failure was defined if a patient met one of three criteria: <ol style="list-style-type: none"> <li>1. Failure to culture convert: did not achieve negative culture by the end of month five, had two positive cultures during the continuation phase or one positive culture during the last three months of treatment.</li> <li>2. Resistance amplification: amplification of resistance to either ofloxacin or to two injectables (capreomycin and kanamycin) on a sputum sample collected 30 days or more after the start of treatment.</li> <li>3. Clinical decision due to lack of clinical response, drug toxicity or intolerance.</li> </ol> |
| <b>Lost to follow-up (LTFU) during treatment</b> | Defined as treatment interruption for two or more consecutive months, for any reason.                                                                                                                                                                                                                                                                                                                                                                                                                                                                                                                                                               |
| <b>LTFU post treatment</b>                       | An MDR-TB patient with an outcome at the end of treatment of either treatment cure, complete, treatment outcome "other", or transfer out, who is non-contactable during the twelve-month post-treatment period (as assessed at the end of 12 +/-3 months).                                                                                                                                                                                                                                                                                                                                                                                          |
| <b>Recurrence-free cure</b>                      | An MDR-TB patient who meets the criteria of cured, or completed short course of treatment, and remains asymptomatic at the end of the follow-up period (one year after treatment completion).                                                                                                                                                                                                                                                                                                                                                                                                                                                       |
| <b>Recurrence</b>                                | An MDR-TB patient who meets the criteria of cured, or completed SR, and at any time during the follow up period (first year after treatment completion) is subsequently diagnosed with at least one sample of bacteriologically positive RR-TB by culture and DST.                                                                                                                                                                                                                                                                                                                                                                                  |
